# Supplementary material
Source: publisher figshare collection journal article supplement (https://adisjournals.figshare.com/ndownloader/files/34540892)
Supplement: Supplementary file 1 [file 34540892]

## Lower-sodium oxybate (Xywav®) : Adis Evaluation

### Clinical Considerations

- A novel oxybate formulation with same active moiety and 92% less sodium content than sodium oxybate
- First drug approved for the treatment of idiopathic hypersomnia in adults
- Effectively improves excessive daytime sleepiness and cataplexy in adults and children with narcolepsy and idiopathic hypersomnia-related symptoms in adults
- Demonstrates significant improvement on health related quality of life outcomes
- Generally well tolerated

### Plain Language Summary

#### *Background and rationale*

- Narcolepsy and idiopathic hypersomnia are rare, chronic sleep disorders that can debilitate patients' cognitive function, social functioning and health-related quality of life. They are primarily characterized by excessive daytime sleepiness (EDS) and often require long-term (even life-long) treatment to reduce symptoms and improve functioning
- Sodium oxybate (Xyrem®) is an effective treatment option for EDS and cataplexy in patients with narcolepsy; however, its high sodium content may put patients at higher risk of increased blood pressure and cardiovascular disease.
- To reduce the excessive sodium intake associated with long-term therapy, lower-sodium oxybate (Xywav®), a new oxybate formulation with 92% less sodium content, has been developed
- In the USA, it is approved for the treatment of cataplexy or EDS in adults and children aged ≥ 7 years with narcolepsy, and is the first drug approved for the treatment of idiopathic hypersomnia in adults

#### *Clinical findings*

- In pivotal phase 3 trials, following dose titration and optimization periods, participants randomized to discontinue lower-sodium oxybate and take placebo showed significant worsening in narcolepsy- and idiopathic hypersomnia-related symptoms, as well as health-related quality of life outcomes compared to participants who continued taking lower-sodium oxybate
- Lower-sodium oxybate is generally well tolerated, with its safety profile similar to that of sodium oxybate

#### *Conclusion*

Lower-sodium oxybate is a valuable treatment option for children and adults with narcolepsy and adults with idiopathic hypersomnia

This plain language summary represents the opinions of the author. For a full list of declarations, including funding and author disclosure statements, please see the full text online. © Springer Nature Switzerland AG 2022.
